# Supplementary material for: School wellbeing and psychological characteristics of online learning in families of children with and without hearing loss during the Covid‐19 pandemic
Source: PubMed Central journal article supplement (PMC9350277; doi:10.1002/pits.22761), 2022-07-13
Supplement: PITS-9999-0-s001.pdf [file PITS-9999-0-s001.pdf]

## APPENDIX

**Table S1**

| PARENTS                                                                                             | Overall Sample<br>(N=61) | Child NH<br>(N=18) | Child HL<br>(N=43) |
|-----------------------------------------------------------------------------------------------------|--------------------------|--------------------|--------------------|
| <b>Sex, n (%)</b>                                                                                   |                          |                    |                    |
| Male                                                                                                | 10 (16.393)              | 2 (11.111)         | 8 (18.605)         |
| Female                                                                                              | 51 (83.607)              | 16 (88.889)        | 35 (81.395)        |
| <b>Age, (m.s.d.)</b>                                                                                |                          |                    |                    |
|                                                                                                     | 44.885 ±6.298            | 47.00±5.379        | 44±6.499           |
| <b>Education, n (%)</b>                                                                             |                          |                    |                    |
| Middle school only                                                                                  | 9 (14.754)               | 0 (0.000)          | 9 (20.930)         |
| High School                                                                                         | 22 (36.066)              | 6 (33.333)         | 16 (37.209)        |
| Undergraduate                                                                                       | 24 (39.344)              | 9 (55.556)         | 14 (32.558)        |
| Post-graduate                                                                                       | 6 (9.836)                | 2 (11.111)         | 4 (9.302)          |
| <b>Family income, n (%)</b>                                                                         |                          |                    |                    |
| <36 000 €                                                                                           | 30 (49.180)              | 4 (22.222)         | 26 (60.465)        |
| 36k – 70k €                                                                                         | 26 (42.623)              | 11 (61.111)        | 15 (34.884)        |
| 70k – 100k €                                                                                        | 4 (6.557)                | 3 (16.667)         | 1 (2.326)          |
| > 100k €                                                                                            | 1 (1.639)                | 0 (0.000)          | 1 (2.326)          |
| <b>Level of concern about school closure, n (%)</b>                                                 |                          |                    |                    |
| Not at all                                                                                          | 2 (3.279)                | 0 (0.000)          | 2 (4.651)          |
| Slightly                                                                                            | 7 (11.475)               | 2 (11.111)         | 5 (11.628)         |
| Quite                                                                                               | 28 (45.902)              | 7 (38.889)         | 21 (48.837)        |
| Very                                                                                                | 18 (29.508)              | 7 (38.889)         | 11 (25.581)        |
| Extremely                                                                                           | 6 (9.836)                | 2 (11.111)         | 4 (9.32)           |
| <b>Strength of home internet connection, n (%)</b>                                                  |                          |                    |                    |
| Excellent                                                                                           | 14 (22.951)              | 7 (38.889)         | 7 (16.279)         |
| Good                                                                                                | 25 (40.984)              | 8 (44.444)         | 17 (39.535)        |
| Fair                                                                                                | 21 (34.426)              | 3 (16.667)         | 18 (41.800)        |
| Poor                                                                                                | 1 (1.639)                | 0 (0.000)          | 1 (2.326)          |
| <b>General opinion about online-learning, n (%)</b>                                                 |                          |                    |                    |
| Useless                                                                                             | 1 (1.639)                | 0 (0.000)          | 1 (2.326)          |
| Not very useful                                                                                     | 15 (24.590)              | 5 (27.778)         | 10 (23.256)        |
| Quite useful                                                                                        | 33 (54.098)              | 11 (61.111)        | 22 (51.165)        |
| Very useful                                                                                         | 8 (13.115)               | 0 (0.000)          | 8 (18.605)         |
| Extremely useful                                                                                    | 4 (6.557)                | 2 (11.111)         | 2 (4.651)          |
| <b>Feel that their child is wasting their time, n (%)</b>                                           |                          |                    |                    |
| Yes                                                                                                 | 11 (18.033)              | 2 (11.111)         | 9 (20.930)         |
| No                                                                                                  | 42 (68.852)              | 13 (72.222)        | 29 (67.442)        |
| Don't know                                                                                          | 8 (13.115)               | 3 (16.667)         | 5 (11.628)         |
| <b>Consider lessons online to be an advantage for your child, n (%)</b>                             |                          |                    |                    |
| Yes                                                                                                 | 38 (62.295)              | 12 (66.667)        | 26 (60.465)        |
| No                                                                                                  | 15 (24.590)              | 5 (27.778)         | 10 (23.256)        |
| Don't know                                                                                          | 8 (13.115)               | 1 (5.556)          | 7 (16.279)         |
| <b>Level of child's hearing capacity (see hypotheses*), n (%)</b>                                   |                          |                    |                    |
| NH                                                                                                  | 18 (29.508)              | 18 (100.000)       | 0 (0.000)          |
| HA                                                                                                  | 10 (16.393)              | 0 (0.000)          | 10 (23.256)        |
| BIM                                                                                                 | 9 (14.754)               | 0 (0.000)          | 9 (20.930)         |
| UCI                                                                                                 | 13 (21.311)              | 0 (0.000)          | 13 (30.233)        |
| BCT                                                                                                 | 11 (18.033)              | 0 (0.000)          | 11 (25.581)        |
| <b>Need for parental presence during online lessons, n (%)</b>                                      |                          |                    |                    |
| Yes                                                                                                 | 13 (21.311)              | 1 (5.556)          | 12 (27.907)        |
| No                                                                                                  | 48 (78.689)              | 17 (94.444)        | 31 (72.093)        |
| <b>Opinion about child's understanding of what teachers are saying during online lessons, n (%)</b> |                          |                    |                    |
| No understanding                                                                                    | 1 (1.639)                | 1 (5.556)          | 0 (0.000)          |
| Some Understanding                                                                                  | 7 (11.475)               | 0 (0.000)          | 7 (16.279)         |
| Fair Understanding                                                                                  | 21 (34.426)              | 3 (16.667)         | 18 (41.800)        |
| Good Understanding                                                                                  | 24 (39.344)              | 9 (50.000)         | 15 (34.884)        |
| Extremely Good Understanding                                                                        | 8 (13.115)               | 5 (27.778)         | 3 (6.977)          |
| <b>Teachers use additional materials/book for your son/daughter, n (%)</b>                          |                          |                    |                    |
| Yes                                                                                                 | 29 (47.541)              | 8 (44.444)         | 21 (48.837)        |
| No                                                                                                  | 32 (52.459)              | 10 (55.556)        | 22 (51.165)        |
| <b>How do you feel your son/daughter appears following online lessons, n (%)</b>                    |                          |                    |                    |
| Satisfied                                                                                           | 17 (27.869)              | 5 (27.778)         | 12(27.907)         |
| Tired                                                                                               | 26 (42.623)              | 11 (61.111)        | 15 (34.884)        |
| Nervous                                                                                             | 9 (14.754)               | 3 (16.667)         | 6 (13.953)         |
| He/she reports headaches                                                                            | 6 (9.836)                | 1 (5.556)          | 5 (11.628)         |
| He/she reports burning eyes                                                                         | 1 (1.639)                | 1 (5.556)          | 0 (0.000)          |
| I don't notice anything in particular                                                               | 15 (24.590)              | 2 (11.111)         | 13 (30.233)        |

| STUDENTS                                                                       | Overall Sample<br>(N=61) | Students NH<br>(N=18) | Student HL<br>(N=43) |
|--------------------------------------------------------------------------------|--------------------------|-----------------------|----------------------|
| <b>Sex, n (%)</b>                                                              |                          |                       |                      |
| Male                                                                           | 25 (40.984)              | 5 (27.778)            | 20 (46.512)          |
| Female                                                                         | 36 (59.016)              | 13 (72.222)           | 23 (53.488)          |
| <b>Age, <math>\mu</math>±(S.D.)</b>                                            |                          |                       |                      |
|                                                                                | 11 (±1.732)              | 12.94 (±2.838)        | 11 (±1.732)          |
| <b>Education, n (%)</b>                                                        |                          |                       |                      |
| Elementary school- 3 <sup>rd</sup>                                             | 9 (14.754)               | 1 (5.556)             | 8 (18.605)           |
| Elementary school- 4 <sup>th</sup>                                             | 78 (13.115)              | 4 (22.222)            | 4 (9.302)            |
| Elementary school- 5 <sup>th</sup>                                             | 4 (6.557)                | 2 (11.111)            | 2 (4.651)            |
| Middle school-6 <sup>th</sup>                                                  | 7 (11.475)               | 1 (5.556)             | 6 (13.953)           |
| Middle school- 7 <sup>th</sup>                                                 | 11 (18.033)              | 1 (5.556)             | 10 (23.256)          |
| Middle school- 8 <sup>th</sup>                                                 | 6 (9.836)                | 2 (11.111)            | 4 (9.32)             |
| High school-9 <sup>th</sup>                                                    | 2 (3.279)                | 2 (11.111)            | 0 (0.000)            |
| High school-10 <sup>th</sup>                                                   | 4 (6.557)                | 1 (5.556)             | 3 (6.977)            |
| High school-11 <sup>th</sup>                                                   | 6 (9.836)                | 3 (16.667)            | 3 (6.977)            |
| High school-12 <sup>th</sup>                                                   | 3 (4.918)                | 1 (5.556)             | 2 (4.651)            |
| High school-13 <sup>th</sup>                                                   | 1 (1.639)                | 0 (0.000)             | 1 (2.326)            |
| <b>Currently taking lessons online</b>                                         |                          |                       |                      |
| Yes                                                                            | 57 (93.443)              | 16 (88.889)           | 41 (95.349)          |
| No                                                                             | 4 (6.557)                | 2 (11.111)            | 2 (4.651)            |
| <b>Usual mode of connection to online lessons</b>                              |                          |                       |                      |
| Mobile phone                                                                   | 14 (22.951)              | 3 (16.667)            | 11 (25.381)          |
| Personal computer (PC)                                                         | 39 (63.934)              | 11 (61.111)           | 28 (65.115)          |
| Tablet                                                                         | 12 (19.672)              | 2 (11.111)            | 10 (23.256)          |
| No Answer                                                                      | 4 (6.557)                | 2 (11.111)            | 2 (4.651)            |
| <b>Presence of a fixed workstation at home to follow online lessons, n (%)</b> |                          |                       |                      |
| Yes, in my bedroom                                                             | 26 (42.6223)             | 9 (50.000)            | 17 (39.535)          |
| Yes, in my living room                                                         | 11 (18.033)              | 3 (16.667)            | 8 (18.605)           |
| Yes, in my studio/office                                                       | 4 (6.557)                | 2 (11.111)            | 2 (4.651)            |
| Yes, in my kitchen                                                             | 8 (13.115)               | 2 (11.111)            | 6 (13.953)           |
| I do not have a fixed location                                                 | 8 (13.115)               | 0 (0.000)             | 8 (18.605)           |
| No answer                                                                      | 4 (6.557)                | 2 (11.111)            | 2 (4.651)            |
| <b>When you are connected for online lessons, mostly, n (%)</b>                |                          |                       |                      |
| You are alone                                                                  | 42 (68.852)              | 13 (72.222)           | 29 (67.442)          |
| You are with your mother                                                       | 12 (19.672)              | 2 (11.111)            | 10 (23.256)          |
| You are with your father                                                       | 6 (9.836)                | 0 (0.000)             | 6 (13.953)           |
| You are with your brother(s) and/or sister(s)                                  | 1 (1.639)                | 1 (5.556)             | 0 (0.000)            |
| No answer                                                                      | 4 (6.557)                | 2 (11.111)            | 2 (4.651)            |
| <b>Program/platform used by the school to organize online lessons, n (%)</b>   |                          |                       |                      |
| Classroom                                                                      | 25 (40.984)              | 7 (38.889)            | 18 (41.860)          |
| We school                                                                      | 9 (14.754)               | 0 (0.000)             | 9 (20.930)           |
| Moodle                                                                         | 0 (0.000)                | 0 (0.000)             | 0 (0.000)            |
| Edmodo                                                                         | 3 (4.918)                | 1 (5.556)             | 2 (4.651)            |
| Skype                                                                          | 3 (4.918)                | 0 (0.000)             | 3 (6.977)            |
| WhatsApp                                                                       | 2 (3.279)                | 0 (0.000)             | 2 (4.651)            |
| Other                                                                          | 31 (50.820)              | 9 (50.000)            | 22 (51.163)          |
| No answer                                                                      | 4 (6.557)                | 2 (11.111)            | 2 (4.651)            |
| <b>Online lessons are listened to via, n (%)</b>                               |                          |                       |                      |
| Speakers (on the PC or connected to the device used)                           | 33 (54.098)              | 11 (61.111)           | 22 (51.163)          |
| Earphones                                                                      | 22 (36.066)              | 5 (27.778)            | 17 (39.535)          |
| Bluetooth connection system                                                    | 3 (4.918)                | 0 (0.000)             | 3 (6.977)            |
| FM system                                                                      | 2 (3.279)                | 0 (0.000)             | 2 (4.651)            |
| No answer                                                                      | 6 (9.836)                | 2 (11.111)            | 4 (9.302)            |
| <b>During lessons online, the webcam is active, n (%)</b>                      |                          |                       |                      |
| Always                                                                         | 38 (62.295)              | 11 (61.111)           | 27 (62.791)          |
| Never                                                                          | 1 (1.639)                | 1 (5.556)             | 0 (0.000)            |
| Only for some subjects                                                         | 18 (29.508)              | 4 (22.222)            | 14 (32.558)          |
| No answer                                                                      | 4 (6.557)                | 2 (11.111)            | 2 (4.651)            |
| <b>How enjoyable it is to have lessons online, n (%)</b>                       |                          |                       |                      |
| Not at all                                                                     | 5 (8.197)                | 2 (11.111)            | 3 (6.977)            |
| Slightly enjoyable                                                             | 11 (18.033)              | 4 (22.222)            | 7 (16.279)           |
| Quite enjoyable                                                                | 30 (49.180)              | 9 (50.000)            | 21 (48.837)          |
| Very enjoyable                                                                 | 7 (11.475)               | 1 (5.556)             | 6 (13.953)           |
| Extremely enjoyable                                                            | 4 (6.557)                | 0 (0.000)             | 4 (9.302)            |
| No answer                                                                      | 4 (6.557)                | 2 (11.111)            | 2 (4.651)            |

| Audio clarity during online lessons, n (%)                                                          |             |             |             |
|-----------------------------------------------------------------------------------------------------|-------------|-------------|-------------|
| Not at all                                                                                          | 1 (1.639)   | 0 (0.000)   | 1 (2.326)   |
| Slightly clear                                                                                      | 7 (11.475)  | 3 (6.667)   | 4 (9.302)   |
| Quite clear                                                                                         | 35 (57.377) | 8 (44.444)  | 27 (62.791) |
| Very clear                                                                                          | 10 (16.393) | 3 (6.667)   | 7 (16.279)  |
| Extremely clear                                                                                     | 4 (6.557)   | 2 (11.111)  | 2 (4.651)   |
| No answer                                                                                           | 4 (6.557)   | 2 (11.111)  | 2 (4.651)   |
| Which voice is best understood online, n (%)                                                        |             |             |             |
| Male                                                                                                | 2 (3.279)   | 0 (0.000)   | 2 (4.651)   |
| Female                                                                                              | 6 (9.836)   | 2 (11.111)  | 4 (9.302)   |
| Both                                                                                                | 47 (77.049) | 14 (77.778) | 33 (76.744) |
| None                                                                                                | 2 (3.279)   | 0 (0.000)   | 2 (4.651)   |
| No answer                                                                                           | 4 (6.557)   | 2 (11.111)  | 2 (4.651)   |
| There is something specific that makes it difficult to understand what the teacher is saying, n (%) |             |             |             |
| Speed of speech                                                                                     | 20 (32.787) | 5 (27.778)  | 15 (34.884) |
| Load volume voice                                                                                   | 7 (11.475)  | 2 (11.111)  | 5 (11.628)  |
| Low volume voice                                                                                    | 20 (32.787) | 7 (38.889)  | 13 (30.235) |
| Teacher's beard                                                                                     | 0 (0.000)   | 0 (0.000)   | 0 (0.000)   |
| Head movements                                                                                      | 1 (1.639)   | 1 (5.556)   | 0 (0.000)   |
| Nothing                                                                                             | 16 (26.230) | 4 (22.222)  | 12 (27.907) |
| Other                                                                                               | 8 (13.115)  | 4 (22.222)  | 4 (9.302)   |
| No answer                                                                                           | 4 (6.557)   | 2 (11.111)  | 2 (4.651)   |
| Opinion about online lessons, n (%)                                                                 |             |             |             |
| Boring                                                                                              | 14 (22.951) | 5 (27.778)  | 9 (20.930)  |
| Interesting                                                                                         | 11 (18.033) | 3 (16.667)  | 8 (18.605)  |
| Normal                                                                                              | 28 (45.902) | 8 (44.444)  | 20 (46.512) |
| Tiring                                                                                              | 14 (22.951) | 6 (33.333)  | 8 (18.605)  |
| Difficult to follow                                                                                 | 8 (13.115)  | 0 (0.000)   | 8 (18.605)  |
| Funny                                                                                               | 6 (9.836)   | 1 (5.556)   | 5 (11.628)  |
| No answer                                                                                           | 4 (6.557)   | 2 (11.111)  | 2 (4.651)   |
| Reason why you are not currently taking online lessons, n (%)                                       |             |             |             |
| Lack of internet connection at home                                                                 | 0 (0.000)   | 0 (0.000)   | 0 (0.000)   |
| Lack of PC/tablet/cell phone to connect with                                                        | 0 (0.000)   | 0 (0.000)   | 0 (0.000)   |
| Lack of desire                                                                                      | 0 (0.000)   | 0 (0.000)   | 0 (0.000)   |
| Too much personal difficulty in following online lessons                                            | 0 (0.000)   | 0 (0.000)   | 0 (0.000)   |
| My teacher (and/or support teacher) send homework directly                                          | 4 (6.557)   | 2 (11.111)  | 2 (4.651)   |
| No answer                                                                                           | 57 (93.443) | 16 (88.888) | 41 (95.349) |

**Table S1- Socio-demographic characteristics and synthesis of the responses to questions about online learning of the participants (Parents and Students) and their distribution based on hearing characteristics (Normal hearing-NH; Hearing loss-HL).**

**Table S3**

| Groups | UCI         |          |          |          |          | BIM      |          |          |          |          | HA       |          |          |          |          | BCI      |          |          |          |          | NH       |          |          |          |          |
|--------|-------------|----------|----------|----------|----------|----------|----------|----------|----------|----------|----------|----------|----------|----------|----------|----------|----------|----------|----------|----------|----------|----------|----------|----------|----------|
|        | QBS scales* | GBS      | RWC      | RWT      | EA       | SE       | GBS      | RWC      | RWT      | EA       | SE       | GBS      | RWC      | RWT      | EA       | SE       | GBS      | RWC      | RWT      | EA       | SE       | GBS      | RWC      | RWT      | EA       |
| UCI    | μ 58.857    | μ 48.429 | μ 39.571 | μ 58.571 | μ 56.286 | μ 48.667 | μ 49     | μ 50.556 | μ 55.111 | μ 44.444 | μ 50.875 | μ 42.875 | μ 37.125 | μ 40.875 | μ 38.625 | μ 52.9   | μ 48.1   | μ 42.8   | μ 49.8   | μ 47.4   | μ 50.455 | μ 49.364 | μ 49.909 | μ 54.455 | μ 49.273 |
| UCI    | 0.020567    | 0.000003 | 0.000003 | 0.000003 | 0.000003 | 0.000003 | 0.000003 | 0.000003 | 0.000003 | 0.000003 | 0.000003 | 0.000003 | 0.000003 | 0.000003 | 0.000003 | 0.000003 | 0.000003 | 0.000003 | 0.000003 | 0.000003 | 0.000003 | 0.000003 | 0.000003 | 0.000003 | 0.000003 |
| UCI    | 0.000003    | 0.04052  | 0.000003 | 0.000003 | 0.000003 | 0.000003 | 0.000003 | 0.000003 | 0.000003 | 0.000003 | 0.000003 | 0.000003 | 0.000003 | 0.000003 | 0.000003 | 0.000003 | 0.000003 | 0.000003 | 0.000003 | 0.000003 | 0.000003 | 0.000003 | 0.000003 | 0.000003 | 0.000003 |
| UCI    | 0.988825    | 0.024117 | 0.000003 | 0.000003 | 0.539194 | 0.099904 | 0.110537 | 0.162444 | 0.508606 | 0.018451 | 0.17371  | 0.008412 | 0.000232 | 0.002772 | 0.000666 | 0.309422 | 0.063881 | 0.062885 | 0.132737 | 0.065411 | 0.162187 | 0.120625 | 0.138871 | 0.449748 | 0.119393 |
| UCI    | 0.519248    | 0.08708  | 0.000008 | 0.539194 | 0.206672 | 0.225241 | 0.31401  | 0.810244 | 0.050168 | 0.332503 | 0.025895 | 0.00114  | 0.010059 | 0.002915 | 0.534896 | 0.177933 | 0.025512 | 0.272177 | 0.144394 | 0.312815 | 0.243638 | 0.274822 | 0.726875 | 0.240615 |          |
| BIM    | 0.091573    | 0.96126  | 0.119658 | 0.099904 | 0.206572 | 0.928655 | 0.676597 | 0.160484 | 0.321742 | 0.71287  | 0.308765 | 0.04941  | 0.180177 | 0.087224 | 0.478966 | 0.914394 | 0.309833 | 0.844172 | 0.817405 | 0.762638 | 0.000989 | 0.832287 | 0.334245 | 0.908379 |          |
| BIM    | 0.101604    | 0.913677 | 0.109246 | 0.110537 | 0.225241 | 0.928655 | 0.727852 | 0.181124 | 0.29461  | 0.753216 | 0.288679 | 0.044232 | 0.16601  | 0.079007 | 0.51117  | 0.870465 | 0.288565 | 0.88532  | 0.777013 | 0.804205 | 0.945449 | 0.875558 | 0.359965 | 0.955606 |          |
| BIM    | 0.152566    | 0.723003 | 0.06924  | 0.162444 | 0.31401  | 0.676597 | 0.727852 | 0.284209 | 0.184355 | 0.947988 | 0.202961 | 0.02566  | 0.10963  | 0.048371 | 0.654574 | 0.683951 | 0.200508 | 0.89194  | 0.620488 | 0.983615 | 0.835358 | 0.9023   | 0.47427  | 0.82692  |          |
| BIM    | 0.491879    | 0.269075 | 0.009391 | 0.508606 | 0.810244 | 0.160484 | 0.181124 | 0.284209 | 0.017484 | 0.436645 | 0.042603 | 0.002378 | 0.017887 | 0.005699 | 0.673071 | 0.247951 | 0.041999 | 0.364329 | 0.204917 | 0.414423 | 0.330478 | 0.368652 | 0.893269 | 0.326712 |          |
| BIM    | 0.016402    | 0.464608 | 0.383379 | 0.018451 | 0.050168 | 0.321742 | 0.29461  | 0.184355 | 0.017484 | 0.287788 | 0.748354 | 0.203202 | 0.012649 | 0.306416 | 0.162087 | 0.484894 | 0.753834 | 0.364991 | 0.545889 | 0.315765 | 0.403233 | 0.359067 | 0.097682 | 0.404425 |          |
| HA     | 0.16427     | 0.685063 | 0.062148 | 0.17371  | 0.332503 | 0.71287  | 0.753216 | 0.947988 | 0.436645 | 0.287788 | 0.081055 | 0.182629 | 0.616528 | 0.318903 | 0.097166 | 0.336453 | 0.987864 | 0.234435 | 0.386859 | 0.206733 | 0.271058 | 0.239178 | 0.054824 | 0.73321  |          |
| HA     | 0.007318    | 0.319728 | 0.544714 | 0.008412 | 0.025895 | 0.308765 | 0.288679 | 0.202961 | 0.042603 | 0.748354 | 0.081055 | 0.182629 | 0.616528 | 0.318903 | 0.097166 | 0.336453 | 0.987864 | 0.234435 | 0.386859 | 0.206733 | 0.271058 | 0.239178 | 0.054824 | 0.73321  |          |
| HA     | 0.000193    | 0.852774 | 0.540536 | 0.002322 | 0.00114  | 0.04041  | 0.044232 | 0.02566  | 0.002378 | 0.203202 | 0.00155  | 0.182629 | 0.616528 | 0.318903 | 0.097166 | 0.336453 | 0.987864 | 0.234435 | 0.386859 | 0.206733 | 0.271058 | 0.239178 | 0.054824 | 0.73321  |          |
| HA     | 0.002384    | 0.188773 | 0.789871 | 0.002772 | 0.010059 | 0.180177 | 0.16601  | 0.10963  | 0.017887 | 0.152649 | 0.027233 | 0.616528 | 0.365941 | 0.573023 | 0.046525 | 0.202298 | 0.693976 | 0.135501 | 0.241177 | 0.111958 | 0.153727 | 0.132737 | 0.023948 | 0.155336 |          |
| HA     | 0.000561    | 0.092483 | 0.846603 | 0.000666 | 0.002915 | 0.087224 | 0.079007 | 0.048371 | 0.005699 | 0.306416 | 0.005651 | 0.318503 | 0.886978 | 0.573023 | 0.017551 | 0.100916 | 0.443334 | 0.062031 | 0.125126 | 0.049531 | 0.072041 | 0.060577 | 0.008027 | 0.072947 |          |
| BCI    | 0.294927    | 0.457301 | 0.026888 | 0.309422 | 0.534696 | 0.478966 | 0.51117  | 0.654574 | 0.673071 | 0.162087 | 0.678955 | 0.097166 | 0.008269 | 0.046525 | 0.017551 | 0.301199 | 0.025539 | 0.478673 | 0.237209 | 0.654291 | 0.542699 | 0.593978 | 0.750662 | 0.537573 |          |
| BCI    | 0.076518    | 0.946504 | 0.136458 | 0.083881 | 0.177933 | 0.914394 | 0.870465 | 0.683951 | 0.247951 | 0.548494 | 0.464941 | 0.336453 | 0.058244 | 0.202298 | 0.301199 | 0.210878 | 0.703643 | 0.850853 | 0.694787 | 0.829468 | 0.761622 | 0.293584 | 0.837797 |          |          |
| BCI    | 0.007258    | 0.322792 | 0.537501 | 0.008285 | 0.025312 | 0.309833 | 0.288565 | 0.200508 | 0.041999 | 0.975884 | 0.183986 | 0.987864 | 0.309113 | 0.693976 | 0.443334 | 0.025539 | 0.210878 | 0.122839 | 0.265678 | 0.204523 | 0.26934  | 0.236891 | 0.0541   | 0.272254 |          |
| BCI    | 0.127238    | 0.81518  | 0.087322 | 0.132737 | 0.271277 | 0.844172 | 0.88532  | 0.89194  | 0.364329 | 0.364991 | 0.853095 | 0.243435 | 0.03304  | 0.135501 | 0.062031 | 0.478673 | 0.703643 | 0.122839 | 0.595648 | 0.612599 | 0.928966 | 0.982289 | 0.421722 | 0.920326 |          |
| BCI    | 0.05938     | 0.844658 | 0.166247 | 0.065411 | 0.144394 | 0.817405 | 0.777013 | 0.602488 | 0.204917 | 0.454889 | 0.567724 | 0.386859 | 0.074209 | 0.241177 | 0.125126 | 0.237209 | 0.850853 | 0.265678 | 0.595648 | 0.612599 | 0.74012  | 0.675862 | 0.244997 | 0.746457 |          |
| NH     | 0.151606    | 0.734073 | 0.070801 | 0.162187 | 0.332815 | 0.762638 | 0.804205 | 0.983615 | 0.444423 | 0.315765 | 0.366696 | 0.206733 | 0.111958 | 0.049531 | 0.654291 | 0.594787 | 0.204523 | 0.901044 | 0.162599 | 0.79392  | 0.883513 | 0.348375 | 0.783531 |          |          |
| NH     | 0.111584    | 0.872034 | 0.100366 | 0.120825 | 0.243638 | 0.900989 | 0.945449 | 0.835358 | 0.330478 | 0.401233 | 0.796725 | 0.271058 | 0.039939 | 0.153727 | 0.072041 | 0.542699 | 0.829468 | 0.26934  | 0.928966 | 0.74012  | 0.79392  | 0.891549 | 0.254513 | 0.980532 |          |
| NH     | 0.129242    | 0.802501 | 0.085418 | 0.138971 | 0.274822 | 0.832287 | 0.875558 | 0.9023   | 0.368652 | 0.359067 | 0.86087  | 0.29178  | 0.032954 | 0.132737 | 0.060577 | 0.593978 | 0.761622 | 0.36861  | 0.922229 | 0.675862 | 0.883513 | 0.891549 | 0.295709 | 0.878943 |          |
| NH     | 0.431402    | 0.31722  | 0.012937 | 0.449748 | 0.726875 | 0.334245 | 0.359965 | 0.47427  | 0.893269 | 0.097682 | 0.494048 | 0.054824 | 0.00347  | 0.023948 | 0.008027 | 0.750662 | 0.293584 | 0.0541   | 0.412722 | 0.244997 | 0.348375 | 0.254513 | 0.295709 | 0.251265 |          |
| NH     | 0.110037    | 0.878769 | 0.101494 | 0.119393 | 0.240615 | 0.908379 | 0.955606 | 0.82692  | 0.326712 | 0.404425 | 0.786641 | 0.27321  | 0.040469 | 0.153336 | 0.072947 | 0.537573 | 0.83797  | 0.272254 | 0.920326 | 0.746457 | 0.783531 | 0.980532 | 0.878943 | 0.251265 |          |

**Table S3 - Differences in School Wellbeing in Junior Students Hearing Groups.**

The Table shows the post hoc results performed on the significant interaction between the factors QBS scales and Hearing Groups. Significant pairwise differences are indicated in red ( $p \leq 0.05$ ).

\*=abbreviations of QBS child's scales: GBS-Gratification obtained by school results; RWT-Relationship with teachers; RWC-Relationship with classmates; EA-Emotional attitude towards school; SE-Self Efficacy.
